# Supplementary material
Source: PubMed Central journal article supplement (PMC6671626)
Supplement: NIHMS1024852-supplement-Supplemental.pdf [file NIHMS1024852-supplement-Supplemental.pdf]

### Appendix A: Example of Antimicrobial Guideline Pocket Card

| DIAGNOSIS                                                                                                                                                                                                                                                                            | SUSPECTED PATHOGENS                                                                                                                                                              | 1ST-LINE TREATMENT                                                                                                                                                                                  | 2ND-LINE/ALG                         | STEP-DOWN                                                                                                                                                | DURATION (DAYS) | COMMENTS                                                                                                                                                                                                                                                                                                                                                                                                                                                                            |
|--------------------------------------------------------------------------------------------------------------------------------------------------------------------------------------------------------------------------------------------------------------------------------------|----------------------------------------------------------------------------------------------------------------------------------------------------------------------------------|-----------------------------------------------------------------------------------------------------------------------------------------------------------------------------------------------------|--------------------------------------|----------------------------------------------------------------------------------------------------------------------------------------------------------|-----------------|-------------------------------------------------------------------------------------------------------------------------------------------------------------------------------------------------------------------------------------------------------------------------------------------------------------------------------------------------------------------------------------------------------------------------------------------------------------------------------------|
| <p><b>CCAP</b></p> <p>- Hospitalized in previous 90 days<br/>- Long-term care facility resident<br/>- Broad-spectrum antibiotics in prior history of resistant pathogens<br/>- Severe structural lung disease<br/>- Frequent COPD exacerbations requiring 3 weeks or antibiotics</p> | <p><i>S. pneumoniae</i>, <i>H. influenzae</i>, <i>M. catarrhalis</i>, <i>M. pneumoniae</i>, <i>C. pneumoniae</i></p>                                                             | <p>Aspirin 81mg PO QDAY x1<br/>Azithromycin 500mg PO QDAY x1<br/>250mg QDAY x4d</p>                                                                                                                 | <p>Levofloxacin 750mg IV/PO q24h</p> | <p>Cefepime 200mg PO BID<br/>OR<br/>Azithromycin 500mg PO QDAY x1, 250mg QDAY x4d<br/>OR<br/>Doxycycline 100mg PO BID</p>                                | <p>7-10</p>     | <p>*Obtain sputum culture when possible<br/>*PCN III/IV suspect aspiration. Add Meropenem 500mg IV q8h if Vancomycin has already been used. Add Cindamycin 600mg IV q8h<br/>*Linezolid 600mg IV/PO q12h can be substituted if Vancomycin intolerance (SSRI interaction, CBC monitoring for thrombocytopenia)<br/>*Consider adding Azithromycin 500mg q90y x1. Then 250mg qday x4d if suspect atypical<br/>*OTC prolongation in FQSM acrolides<br/>*gaal Vancomycin trough 10-15</p> |
| <p><b>HCAP</b> (lower risk)</p> <p>- Chronic dialysis, home infusion or recent care w/ broad-spectrum factors</p>                                                                                                                                                                    | <p><i>S. pneumoniae</i>, <i>H. influenzae</i>, <i>M. catarrhalis</i>, <i>M. pneumoniae</i>, <i>C. pneumoniae</i></p>                                                             | <p>Ceftriaxone 1g IV q24h<br/>Azithromycin<br/>Aspirin 81mg PO QDAY x1<br/>erythromycin, erythromycin, poor<br/>penetration<br/>Piperacillin/tazobactam 4.5g IV q8h<br/>Cindamycin 600mg IV q8h</p> | <p>Levofloxacin 750mg IV/PO q24h</p> | <p>Levofloxacin 750mg PO q24h<br/>OR<br/>Cefepime 200mg PO BID<br/>Azithromycin 500mg PO QDAY x1, 250mg QDAY x4d<br/>OR<br/>Doxycycline 100mg PO BID</p> | <p>7-10</p>     | <p>*Obtain sputum culture when possible<br/>*PCN III/IV suspect aspiration. Add Meropenem 500mg IV q8h if Vancomycin has already been used. Add Cindamycin 600mg IV q8h<br/>*Linezolid 600mg IV/PO q12h can be substituted if Vancomycin intolerance (SSRI interaction, CBC monitoring for thrombocytopenia)<br/>*Consider adding Azithromycin 500mg q90y x1. Then 250mg qday x4d if suspect atypical<br/>*OTC prolongation in FQSM acrolides<br/>*gaal Vancomycin trough 10-15</p> |
| <p><b>HCAP</b> (higher risk)</p> <p>- Chronic dialysis, home infusion or recent care w/ broad-spectrum factors</p>                                                                                                                                                                   | <p><i>S. pneumoniae</i>, <i>H. influenzae</i>, <i>M. catarrhalis</i>, <i>M. pneumoniae</i>, <i>C. pneumoniae</i></p>                                                             | <p>Meropenem 500mg IV q8h<br/>Azithromycin<br/>Aspirin 81mg PO QDAY x1<br/>erythromycin, erythromycin, poor<br/>penetration<br/>Piperacillin/tazobactam 4.5g IV q8h<br/>Cindamycin 600mg IV q8h</p> | <p>Levofloxacin 750mg IV/PO q24h</p> | <p>Levofloxacin 750mg PO q24h<br/>OR<br/>Cefepime 200mg PO BID<br/>Azithromycin 500mg PO QDAY x1, 250mg QDAY x4d<br/>OR<br/>Doxycycline 100mg PO BID</p> | <p>7-10</p>     | <p>*Obtain sputum culture when possible<br/>*PCN III/IV suspect aspiration. Add Meropenem 500mg IV q8h if Vancomycin has already been used. Add Cindamycin 600mg IV q8h<br/>*Linezolid 600mg IV/PO q12h can be substituted if Vancomycin intolerance (SSRI interaction, CBC monitoring for thrombocytopenia)<br/>*Consider adding Azithromycin 500mg q90y x1. Then 250mg qday x4d if suspect atypical<br/>*OTC prolongation in FQSM acrolides<br/>*gaal Vancomycin trough 10-15</p> |
| <p><b>C-DRG</b> for patients with recent hospitalization</p> <p>- Avoid PPI/H2 blockers without an appropriate indication<br/>- Support infection control measures</p>                                                                                                               | <p><i>M. luteus</i>, <i>M. catarrhalis</i>, <i>M. pneumoniae</i>, <i>C. pneumoniae</i></p>                                                                                       | <p>Meropenem 500mg IV q8h<br/>Azithromycin<br/>Aspirin 81mg PO QDAY x1<br/>erythromycin, erythromycin, poor<br/>penetration<br/>Piperacillin/tazobactam 4.5g IV q8h<br/>Cindamycin 600mg IV q8h</p> | <p>Levofloxacin 750mg IV/PO q24h</p> | <p>Levofloxacin 750mg PO q24h<br/>OR<br/>Cefepime 200mg PO BID<br/>Azithromycin 500mg PO QDAY x1, 250mg QDAY x4d<br/>OR<br/>Doxycycline 100mg PO BID</p> | <p>7-10</p>     | <p>*Obtain sputum culture when possible<br/>*PCN III/IV suspect aspiration. Add Meropenem 500mg IV q8h if Vancomycin has already been used. Add Cindamycin 600mg IV q8h<br/>*Linezolid 600mg IV/PO q12h can be substituted if Vancomycin intolerance (SSRI interaction, CBC monitoring for thrombocytopenia)<br/>*Consider adding Azithromycin 500mg q90y x1. Then 250mg qday x4d if suspect atypical<br/>*OTC prolongation in FQSM acrolides<br/>*gaal Vancomycin trough 10-15</p> |
| <p><b>UTI</b> (see pocket card for details)</p>                                                                                                                                                                                                                                      | <p><i>E. coli</i>, <i>K. pneumoniae</i>, <i>P. aeruginosa</i>, <i>S. pneumoniae</i>, <i>H. influenzae</i>, <i>M. catarrhalis</i>, <i>M. pneumoniae</i>, <i>C. pneumoniae</i></p> | <p>Linezolid 600mg IV/PO q12h<br/>OR<br/>Cefepime 200mg PO BID<br/>Azithromycin 500mg PO QDAY x1, 250mg QDAY x4d<br/>OR<br/>Doxycycline 100mg PO BID</p>                                            | <p>Levofloxacin 750mg IV/PO q24h</p> | <p>Levofloxacin 750mg PO q24h<br/>OR<br/>Cefepime 200mg PO BID<br/>Azithromycin 500mg PO QDAY x1, 250mg QDAY x4d<br/>OR<br/>Doxycycline 100mg PO BID</p> | <p>7-10</p>     | <p>*Obtain sputum culture when possible<br/>*PCN III/IV suspect aspiration. Add Meropenem 500mg IV q8h if Vancomycin has already been used. Add Cindamycin 600mg IV q8h<br/>*Linezolid 600mg IV/PO q12h can be substituted if Vancomycin intolerance (SSRI interaction, CBC monitoring for thrombocytopenia)<br/>*Consider adding Azithromycin 500mg q90y x1. Then 250mg qday x4d if suspect atypical<br/>*OTC prolongation in FQSM acrolides<br/>*gaal Vancomycin trough 10-15</p> |
